# Supplementary material
Source: PubMed Central journal article supplement (PMC2785544)
Supplement: NIHMS150900-supplement-Figs_1_2.pdf [file NIHMS150900-supplement-Figs_1_2.pdf]

**SUPPLEMENTARY FIGURE 2**

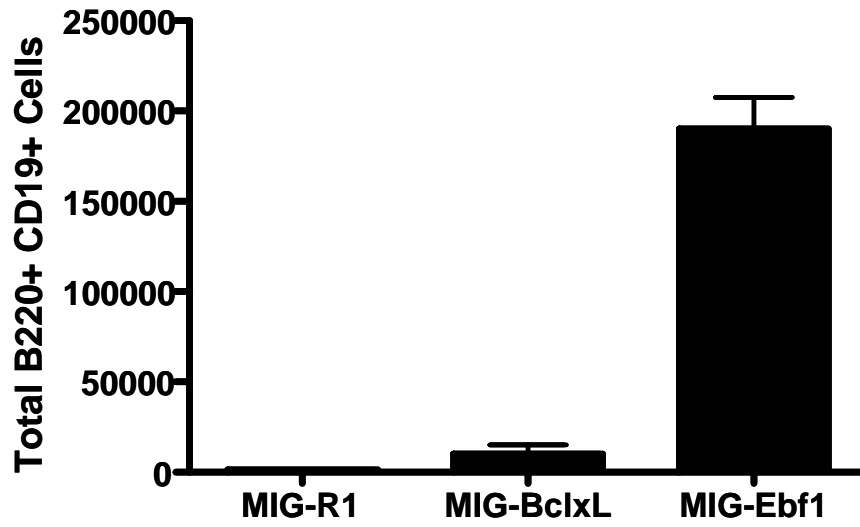

**SUPPLEMENTARY FIGURE 2.** Overexpression of Bcl-xL fails to rescue B-lineage development from *Myb<sup>fl/fl</sup> Mbl-cre* LMPPs. LMPPs were isolated from *Myb<sup>fl/fl</sup> Mbl-cre* bone marrow by fluorescence activated cell sorting, seeded at 5000 cells per well on OP-9 stromal cells and transduced with MIG-R1, MIG-BclxL or MIG-Ebf1. LMPPs were cultured in the presence of SCF, Flt3L, and IL-7 and analyzed 10 days later by flow cytometry for the expression of B220 and CD19 and the number of GFP+ B220+ CD19+ cells were determined.
